# Supplementary material
Source: Springer Nature journal article supplement (https://www.springermedizin.de/resource/supplementary/12885_2006_609_MOESM1_ESM.pdf/9469882)

**a**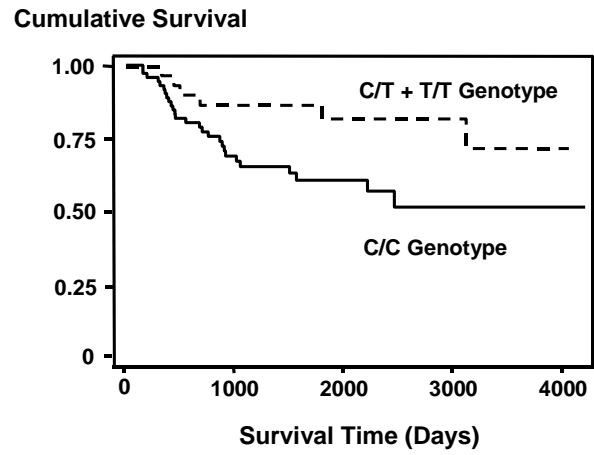**b**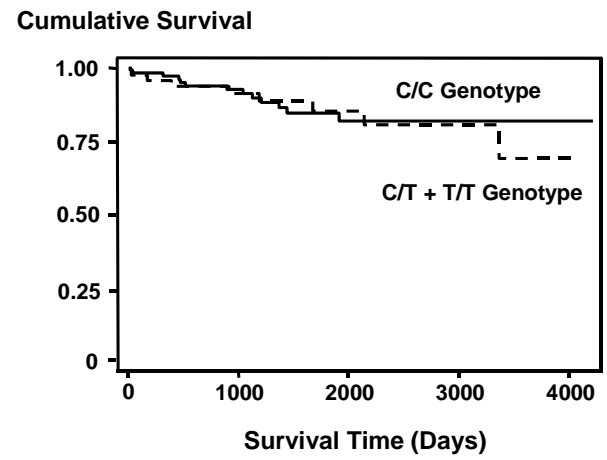**c**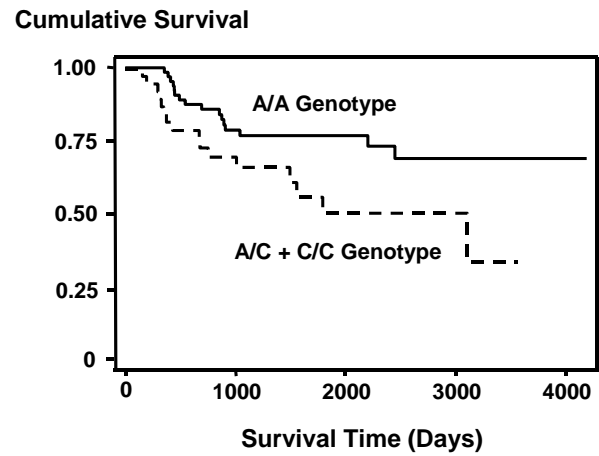**d**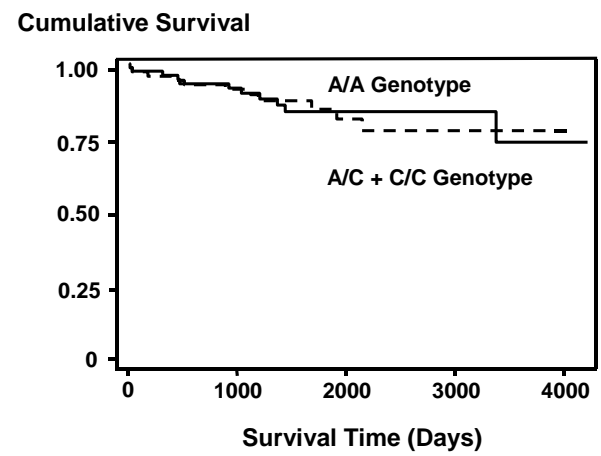

Supplement: MOESM1 [file 9469882]
